# Supplementary material
Source: Springer Nature journal article supplement (https://www.springermedizin.de/resource/supplementary/13041_2008_6_MOESM4_ESM.pdf/25657362)

**A**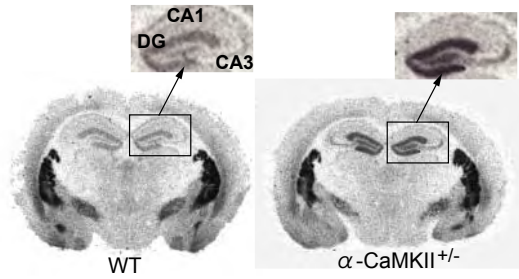**B**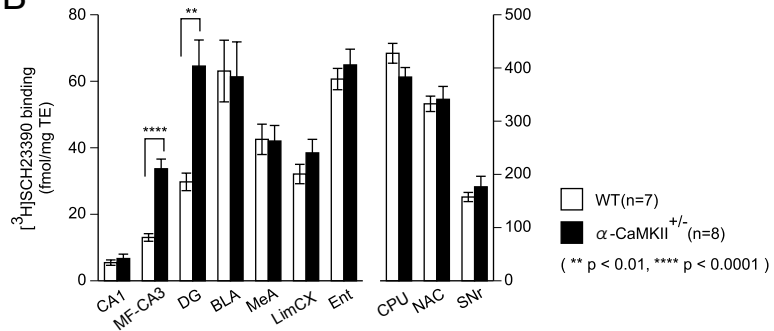**C**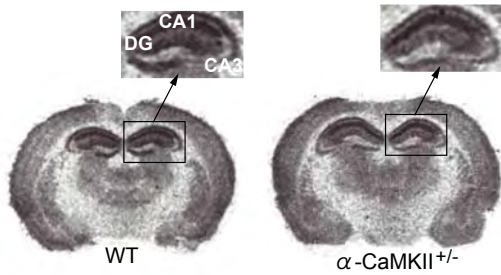**D**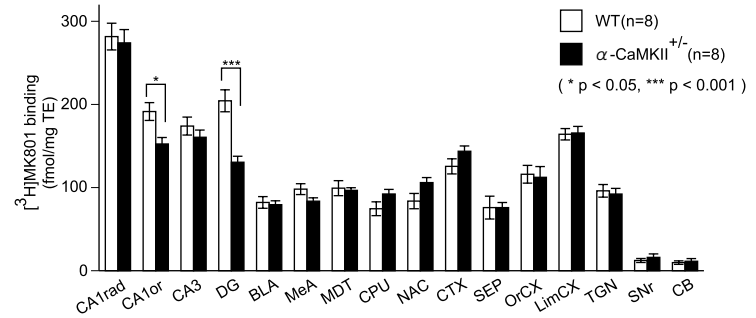**E**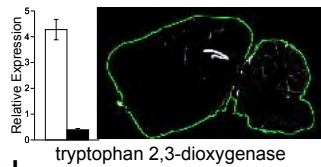**F**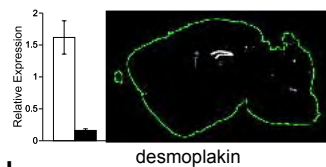**G**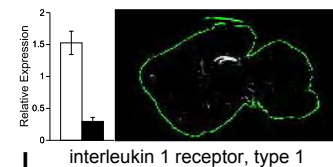**H**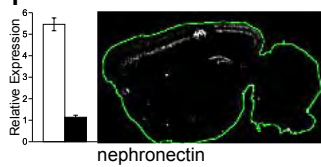**I**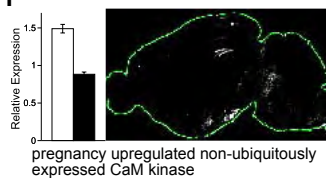**J**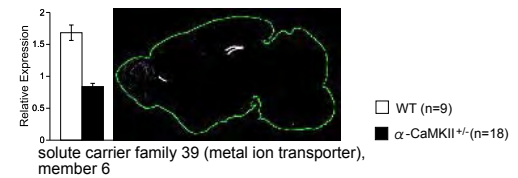**K**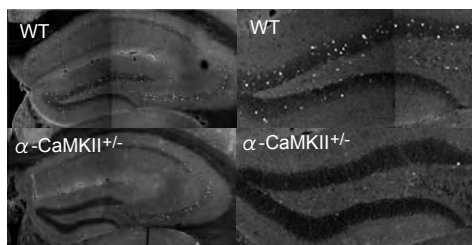**L**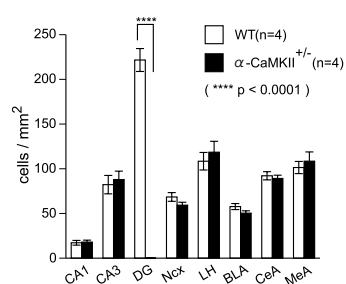

Supplement: MOESM4 [file 25657362]
